# Supplementary material for: Electrospun TiO2 nanorods assembly sensitized by CdS quantum dots: a low-cost photovoltaic material
Source: Royal Society of Chemistry journal article supplement (doi:10.1039/c0ee00161a), 2010-01-01
Supplement: c0ee00161a.pdf [file c0ee00161a.pdf]

## Electronic Supplementary Information

### Electrospun TiO<sub>2</sub> nanorods assembly sensitized by CdS quantum dots:

#### A low-cost photovoltaic material

Yang Shengyuan <sup>a, b</sup>, A. Sreekumaran Nair <sup>b, \*</sup>, Rajan Jose <sup>c</sup>, and Seeram Ramakrishna <sup>b, d, e, \*</sup>

<sup>a</sup> NUS Graduate School for Integrative Sciences and Engineering, Singapore 117456, Singapore

<sup>b</sup> Healthcare and Energy Materials Laboratory, NUS Nanoscience and Nanotechnology Initiative, Singapore 117581, Singapore

<sup>c</sup> Faculty of Industrial Sciences and Technology (FIST), Universiti Malaysia Pahang, 26300 Pahang, Malaysia

<sup>d</sup> Institute of Materials Research and Engineering, Singapore 117602, Singapore

<sup>e</sup> King Saud University, Riyadh 11451, Kingdom of Saudi Arabia

\*Corresponding authors: [mniansn@nus.edu.sg](mailto:mniansn@nus.edu.sg) (A. S. Nair), [seeram@nus.edu.sg](mailto:seeram@nus.edu.sg) (S. Ramakrishna)

## Supplementary Information 1

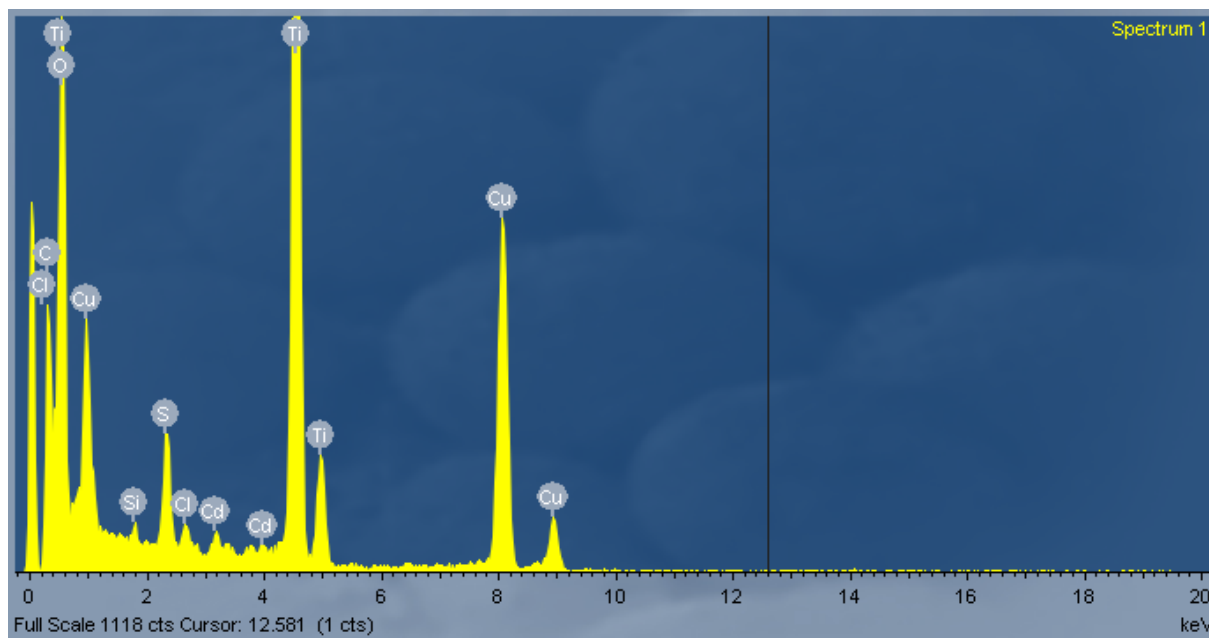

Energy-dispersive X-ray spectrum (EDS) spectrum acquired from a single  $\text{TiO}_2@\text{CdS}$  NR revealing the elemental presence. In addition to Ti, O, Cd and S (from  $\text{TiO}_2@\text{CdS}$ ), presence of Cu and Cl are also revealed. The presence of Cu and Cl arises from the TEM grid and the electrolyte (from NaCl present in the electrolyte, see the experimental section).
